# Supplementary material
Source: publisher site journal article supplement (https://www.spandidos-publications.com/5614/downloadSupplementary)

Figure S1. PKM2 protein overexpression in hepatocellular carcinoma cells. (A) PKM2 protein overexpression in (A) Huh-7 and (B) Hep3B cells. \* $P < 0.05$ . NC, negative control; PKM2, M2 splice isoform of pyruvate kinase; In-PKM2, PKM2 overexpression.

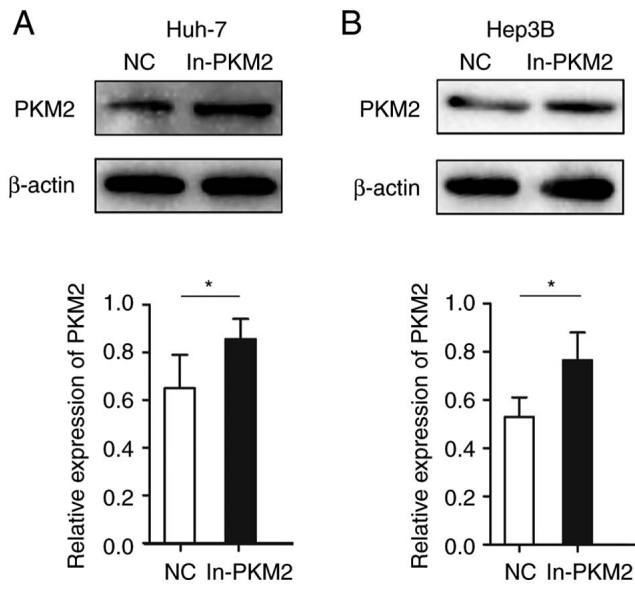

Supplement: Supplementary file 1 [file downloadSupplementary]
